# Supplementary material
Source: Springer Nature journal article supplement (https://www.springermedizin.de/resource/supplementary/13054_2004_2995_MOESM4_ESM.pdf/9719466)

# Macrophages

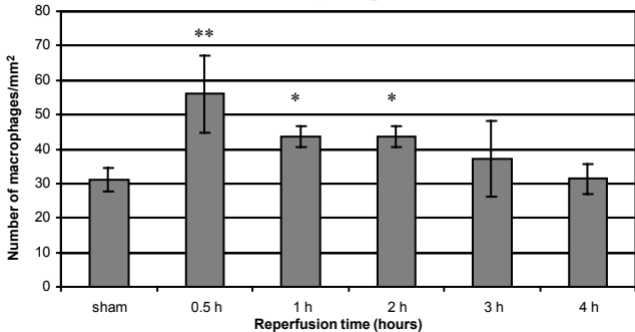

Supplement: MOESM4 [file 9719466]
